# Supplementary material for: Application of prohexadione-calcium priming affects Brassica napus L. seedlings by regulating morph-physiological characteristics under salt stress
Source: PeerJ journal article supplement (doi:10.7717/peerj.17312), 2024-04-26
Supplement: Analysis_of_Significance_of_Differences.xlsx [file Analysis_of_Significance_of_Differences.xlsx]

## Sheet: Sheet1
	Huayouza158						Huayouza62
	Treatment	Mean	Standard Error	Significance of Difference			Treatment	Mean	Standard Error	Significance of Difference
Figure 2						Figure 2
plant height	S0	26.975	0.468946	A		plant height	S0	25.3625	0.295162	b
	Pro-Ca+S0	26.5875	0.462693	A			Pro-Ca+S0	27.825	0.397649	a
	S100	15.7	0.315096	C			S100	15.6	0.40708	d
	Pro-Ca+S100	18.0625	0.263179	B			Pro-Ca+S100	17.525	0.216094	c
	S150	12.0625	0.376989	E			S150	13.325	0.172947	e
	Pro-Ca+S150	13.775	0.279508	D			Pro-Ca+S150	15.1125	0.303219	d
stem thickness	S0	2.6125	0.0548944	B		stem thickness	S0	2.8375	0.0419928	b
	Pro-Ca+S0	3	0.0597614	A			Pro-Ca+S0	3	0.0377964	a
	S100	2.1375	0.0625	D			S100	2	0.0267261	de
	Pro-Ca+S100	2.3875	0.0226582	C			Pro-Ca+S100	2.3625	0.0323899	c
	S150	1.775	0.0700765	E			S150	1.925	0.0411877	e
	Pro-Ca+S150	1.8	0.046291	E			Pro-Ca+S150	2.075	0.0365963	d
leaf area	S0	8967.38	372.918	B		leaf area	S0	12647	495.692	b
	Pro-Ca+S0	10907.9	585.412	A			Pro-Ca+S0	15436.2	447.517	a
	S100	4304.05	292.292	C			S100	5041.64	383.893	d
	Pro-Ca+S100	4833.53	172.87	C			Pro-Ca+S100	6730.46	175.404	c
	S150	2313.46	49.8538	D			S150	4063.59	157.371	e
	Pro-Ca+S150	3021.14	137.042	D			Pro-Ca+S150	5323.65	200.517	d
dry weight	S0	0.299887	0.0138159	B		dry weight	S0	0.377038	0.00927013	b
	Pro-Ca+S0	0.404737	0.017917	A			Pro-Ca+S0	0.47295	0.0220459	a
	S100	0.13485	0.010719	D			S100	0.161637	0.01468	e
	Pro-Ca+S100	0.1987	0.0162574	C			Pro-Ca+S100	0.235937	0.00555299	c
	S150	0.0747625	0.00334354	E			S150	0.146975	0.00598491	e
	Pro-Ca+S150	0.0961	0.00438504	E			Pro-Ca+S150	0.200425	0.00730738	d
seedling strength index	S0	0.0478905	0.00307639	B		seedling strength index	S0	0.060393	0.00145677	b
	Pro-Ca+S0	0.0665571	0.00378713	A			Pro-Ca+S0	0.0767626	0.00275455	a
	S100	0.0263435	0.00150378	D			S100	0.0321723	0.00259301	d
	Pro-Ca+S100	0.0364579	0.001753	C			Pro-Ca+S100	0.054834	0.00165608	b
	S150	0.0187008	0.00117743	E			S150	0.0342426	0.00167897	d
	Pro-Ca+S150	0.0209934	0.00100591	DE			Pro-Ca+S150	0.0459229	0.00192555	c
Figure 3						Figure 3
total root surface area	S0	6.14423	0.466361	C		total root surface area	S0	5.15777	0.259442	d
	Pro-Ca+S0	26.5787	0.625941	A			Pro-Ca+S0	18.2187	0.872234	a
	S100	2.78667	0.052338	B			S100	4.32737	0.197957	d
	Pro-Ca+S100	7.67227	0.244784	B			Pro-Ca+S100	9.99763	0.475245	b
	S150	2.28537	0.175011	D			S150	2.34013	0.149017	e
	Pro-Ca+S150	5.2576	0.474426	C			Pro-Ca+S150	7.86037	0.63215	c
total root mean diameter	S0	0.181967	0.0174071	AB		total root mean diameter	S0	0.221967	0.0255334	a
	Pro-Ca+S0	0.224033	0.0207108	A			Pro-Ca+S0	0.232467	0.0186198	a
	S100	0.205067	0.00948759	A			S100	0.222367	0.015306	a
	Pro-Ca+S100	0.193233	0.00443934	AB			Pro-Ca+S100	0.242367	0.0122358	a
	S150	0.1552	0.0161506	B			S150	0.206	0.00543722	a
	Pro-Ca+S150	0.197933	0.010253	AB			Pro-Ca+S150	0.247367	0.000856997	a
total root length	S0	103.376	8.86956	BC		total root length	S0	74.3393	7.54373	c
	Pro-Ca+S0	323.84	12.2897	A			Pro-Ca+S0	153.079	4.31183	a
	S100	37.9906	0.393426	D			S100	62.9808	7.59995	c
	Pro-Ca+S100	127.3	6.14009	B			Pro-Ca+S100	126.491	11.2187	ab
	S150	44.4212	3.5258	D			S150	34.1551	3.70091	d
	Pro-Ca+S150	85.7319	11.48	C			Pro-Ca+S150	117.302	15.7357	b
total root volume	S0	0.0263333	0.00466667	BC		total root volume	S0	0.0286667	0.00371184	d
	Pro-Ca+S0	0.172333	0.0074461	A			Pro-Ca+S0	0.095	0.00493288	a
	S100	0.0156667	0.000333333	CD			S100	0.024	0.00057735	d
	Pro-Ca+S100	0.0366667	0.00133333	B			Pro-Ca+S100	0.059	0.00351188	b
	S150	0.00866667	0.000881917	D			S150	0.0126667	0.000881917	e
	Pro-Ca+S150	0.026	0.001	BC			Pro-Ca+S150	0.0466667	0.00491031	c
total root tip number	S0	1610	102.026	C		total root tip number	S0	750.333	90.2336	cd
	Pro-Ca+S0	5124.33	220.243	A			Pro-Ca+S0	2009	85.3307	a
	S100	555	30.1386	D			S100	912	93.5004	c
	Pro-Ca+S100	2088.33	157.947	B			Pro-Ca+S100	2032	205.505	a
	S150	779.667	43.8799	D			S150	401.333	48.2919	d
	Pro-Ca+S150	1578	80.1332	C			Pro-Ca+S150	1438.33	140.452	b
Figure 4						Figure 4
Pn	S0	24.8316	0.964523	AB		Pn	S0	24.3992	0.416241	c
	Pro-Ca+S0	26.0209	0.108419	A			Pro-Ca+S0	25.8764	0.283133	b
	S100	22.8437	0.348805	C			S100	23.3154	0.258332	c
	Pro-Ca+S100	24.8438	0.132698	AB			Pro-Ca+S100	27.4256	0.51884	a
	S150	20.7012	0.487849	D			S150	21.5641	0.519965	d
	Pro-Ca+S150	23.5387	0.447694	BC			Pro-Ca+S150	24.4368	0.0509331	c
Gs	S0	0.826997	0.0268693	BC		Gs	S0	1.01803	0.0253327	a
	Pro-Ca+S0	0.931341	0.00778365	A			Pro-Ca+S0	1.06672	0.0150746	a
	S100	0.706824	0.00636236	D			S100	0.846161	0.0221692	b
	Pro-Ca+S100	0.891657	0.0167671	AB			Pro-Ca+S100	0.968175	0.0309049	a
	S150	0.590377	0.0380758	E			S150	0.627246	0.0362233	c
	Pro-Ca+S150	0.803073	0.0215829	C			Pro-Ca+S150	0.784592	0.0649438	b
Ci	S0	327.594	4.25346	A		Ci	S0	325.448	3.4859	b
	Pro-Ca+S0	328.496	1.05881	A			Pro-Ca+S0	334.567	0.627146	a
	S100	315.163	0.643884	B			S100	326.541	1.65898	b
	Pro-Ca+S100	335.397	1.2776	A			Pro-Ca+S100	326.006	2.42271	b
	S150	317.838	4.52202	B			S150	319.439	1.57044	b
	Pro-Ca+S150	328.778	0.938269	A			Pro-Ca+S150	326.816	3.77539	b
Tr	S0	11.8972	0.585699	A		Tr	S0	11.9068	0.691044	b
	Pro-Ca+S0	12.1903	0.0790255	A			Pro-Ca+S0	13.5292	0.184428	a
	S100	9.93454	0.194248	B			S100	11.808	0.224665	b
	Pro-Ca+S100	11.5614	0.436878	A			Pro-Ca+S100	12.8709	0.240095	ab
	S150	8.53441	0.151774	C			S150	9.77579	0.491237	c
	Pro-Ca+S150	10.2534	0.11104	B			Pro-Ca+S150	12.0028	0.539884	b
ФPSII	S0	0.404949	0.0103556	AB		ФPSII	S0	0.410491	0.0103272	bcd
	Pro-Ca+S0	0.422319	0.0123801	A			Pro-Ca+S0	0.438416	0.00284878	ab
	S100	0.364344	0.00540658	CD			S100	0.407264	0.0130528	cd
	Pro-Ca+S100	0.388915	0.00706397	BC			Pro-Ca+S100	0.454746	0.00827329	a
	S150	0.353512	0.00736384	D			S150	0.384933	0.0124997	d
	Pro-Ca+S150	0.377849	0.00366587	CD			Pro-Ca+S150	0.428571	0.00728584	abc
SPAD	S0	31.7	0.951315	C		SPAD	S0	34.075	0.521816	d
	Pro-Ca+S0	32.175	0.507239	BC			Pro-Ca+S0	37.925	0.319831	c
	S100	33.7	0.158114	B			S100	38.875	0.363719	c
	Pro-Ca+S100	36.75	0.419325	A			Pro-Ca+S100	40.6	0.334166	b
	S150	36.25	0.490748	A			S150	38.85	0.375278	c
	Pro-Ca+S150	37.8	0.362859	A			Pro-Ca+S150	42.025	0.545245	a
Figure 5						Figure 5
MDA	S0	1.30753	0.020437	BC		MDA	S0	1.58414	0.0232932	bc
	Pro-Ca+S0	1.20109	0.0708348	C			Pro-Ca+S0	1.27527	0.0100796	e
	S100	1.32733	0.0401886	BC			S100	1.63748	0.0542949	b
	Pro-Ca+S100	1.35424	0.00790545	B			Pro-Ca+S100	1.49772	0.0544003	cd
	S150	1.52544	0.069319	A			S150	1.82289	0.0436925	a
	Pro-Ca+S150	1.33164	0.0119692	BC			Pro-Ca+S150	1.41421	0.00265807	d
leaf relative conductivity	S0	0.306874	0.0176246	D		leaf relative conductivity	S0	0.41632	0.00904499	c
	Pro-Ca+S0	0.224238	0.00296095	E			Pro-Ca+S0	0.304067	0.0093321	d
	S100	0.617772	0.01962	C			S100	0.530311	0.0145642	b
	Pro-Ca+S100	0.526751	0.018952	C			Pro-Ca+S100	0.444689	0.0153756	c
	S150	0.690896	0.0446858	D			S150	0.658987	0.0543656	a
	Pro-Ca+S150	0.503524	0.0208325	A			Pro-Ca+S150	0.609653	0.0110289	a
Figure 6						Figure 6
total soluble sugars	S0	5.51776	0.311161	A		total soluble sugars	S0	5.59072	0.225872	c
	Pro-Ca+S0	5.45569	0.23365	A			Pro-Ca+S0	6.48869	0.169691	b
	S100	4.09107	0.391249	B			S100	3.73977	0.00942448	d
	Pro-Ca+S100	5.39236	0.217259	A			Pro-Ca+S100	5.2702	0.265671	c
	S150	3.31314	0.0185758	C			S150	6.64866	0.130169	b
	Pro-Ca+S150	5.25448	0.169607	A			Pro-Ca+S150	7.57264	0.293281	a
total soluble protein	S0	36.3067	0.105053	D		total soluble protein	S0	36.6723	0.0590316	d
	Pro-Ca+S0	37.7016	0.1515	B			Pro-Ca+S0	36.8009	0.0283681	d
	S100	37.1229	0.029387	C			S100	37.7602	0.0902601	b
	Pro-Ca+S100	38.1737	0.0928837	B			Pro-Ca+S100	38.6364	0.0489344	a
	S150	37.542	0.0823494	B			S150	37.4311	0.0626323	c
	Pro-Ca+S150	38.2683	0.0321918	A			Pro-Ca+S150	37.7093	0.0261198	b
Figure 7						Figure 7
SOD	S0	81.7243	3.19812	E		SOD	S0	170.568	2.31425	c
	Pro-Ca+S0	127.947	0.213503	D			Pro-Ca+S0	135.543	4.95445	d
	S100	153.576	8.58044	C			S100	172.523	1.45905	c
	Pro-Ca+S100	196.243	6.23788	B			Pro-Ca+S100	244.658	0.633442	a
	S150	251.226	5.99469	A			S150	212.761	0.979559	b
	Pro-Ca+S150	236.564	11.1605	A			Pro-Ca+S150	214.564	4.08335	b
POD	S0	314.7	15.0919	D		POD	S0	345.3	13.7091	d
	Pro-Ca+S0	479	35.3698	BC			Pro-Ca+S0	436.3	12.2195	c
	S100	488.3	11.9954	BC			S100	599.7	28.4673	b
	Pro-Ca+S100	571.4	7.19097	A			Pro-Ca+S100	770.3	28.8555	a
	S150	458.5	18.6098	C			S150	252.9	20.4685	e
	Pro-Ca+S150	531.7	9.22984	AB			Pro-Ca+S150	279.5	6.68394	e
CAT	S0	326.85	17.098	C		CAT	S0	455.15	18.4417	e
	Pro-Ca+S0	436.55	13.9069	B			Pro-Ca+S0	584.4	21.0392	d
	S100	412.3	12.76	B			S100	786.2	19.0496	c
	Pro-Ca+S100	498.3	1.32791	A			Pro-Ca+S100	962.5	18.8866	a
	S150	317.7	2.86415	C			S150	623.3	19.7627	d
	Pro-Ca+S150	447.4	14.9537	B			Pro-Ca+S150	876.9	10.48	b
APX	S0	364.15	58.8074	A		APX	S0	400.3	17.0627	c
	Pro-Ca+S0	530.2	112.55	A			Pro-Ca+S0	613.35	61.7739	bc
	S100	162.85	10.5399	B			S100	612.4	18.7764	bc
	Pro-Ca+S100	521.35	36.5203	A			Pro-Ca+S100	1157.4	66.8751	a
	S150	124.75	7.53984	B			S150	756.15	64.8646	b
	Pro-Ca+S150	421.45	7.28074	A			Pro-Ca+S150	1317.15	165.652	a
PAL	S0	257.227	8.01089	C		PAL	S0	234.577	0.71838	d
	Pro-Ca+S0	218.847	3.67175	D			Pro-Ca+S0	245.77	0.665162	cd
	S100	268.08	4.07438	C			S100	246.727	5.51021	cd
	Pro-Ca+S100	315.64	5.32966	A			Pro-Ca+S100	285.327	2.09755	b
	S150	257.443	2.92001	C			S150	255.55	1.13731	c
	Pro-Ca+S150	296.023	1.62064	B			Pro-Ca+S150	326.013	9.02805	a
Figure 8						Figure 8
ASA	S0	40.4369	0.458349	C		ASA	S0	44.0577	0.158915	c
	Pro-Ca+S0	46.2763	0.893293	B			Pro-Ca+S0	52.2866	0.463405	b
	S100	38.4315	0.383012	D			S100	43.6544	0.169845	c
	Pro-Ca+S100	41.1989	0.198278	C			Pro-Ca+S100	60.3574	0.262718	a
	S150	29.8023	0.304559	E			S150	37.8794	0.387644	d
	Pro-Ca+S150	49.9033	0.31936	A			Pro-Ca+S150	38.4015	0.0355337	d
GSH	S0	298.041	0.340801	A		GSH	S0	296.73	0.324188	b
	Pro-Ca+S0	296.068	0.143866	C			Pro-Ca+S0	298.075	0.130969	a
	S100	296.996	0.228077	B			S100	292.534	0.337814	d
	Pro-Ca+S100	298.055	0.0606622	A			Pro-Ca+S100	296.615	0.0109894	b
	S150	294.735	0.146561	D			S150	294.465	0.84774	c
	Pro-Ca+S150	297.176	0.198016	B			Pro-Ca+S150	297.161	0.0146283	ab
