# Supplementary material for: Application of prohexadione-calcium priming affects Brassica napus L. seedlings by regulating morph-physiological characteristics under salt stress
Source: PeerJ journal article supplement (doi:10.7717/peerj.17312), 2024-04-26
Supplement: data.xlsx [file data.xlsx]

## Sheet: Morphological
Huayouzha158R							Huayouzha158R
	Shoot length	Coarseness rhizome	Leaf area	Dry weight	Seedling strength index			Total root surface area	Total root mean diameter	Total root length	Total root volume	Total root tip number
S0	24.5	20.1	7855.9	0.2381	0.0372761		S0	5.2138	0.1505	92.5969	0.019	1512
	25.6	21	7912.8	0.2721	0.0388865			6.5529	0.1848	96.5637	0.025	1504
	26.5	23.1	8093.1	0.2733	0.0429141			6.666	0.2106	120.966	0.035	1814
	27.6	23.7	8575.8	0.2873	0.0460389		Pro-Ca+S0	26.5442	0.2003	318.436	0.158	4725
	27.6	24.4	8969.8	0.3153	0.0462993			27.6797	0.2065	305.776	0.176	5163
	27.7	25.5	9478.3	0.316	0.0544455			25.5122	0.2653	347.307	0.183	5485
	28.1	26.4	10390.8	0.3462	0.0546436		S100	2.7114	0.1914	37.2885	0.015	520
	28.2	26.7	10462.5	0.3508	0.06262			2.7613	0.2005	38.0339	0.016	530
Pro-Ca+S0	28.6	32	13076.9	0.3313	0.0550709			2.8873	0.2233	38.6493	0.016	615
	28	29	12340.8	0.3621	0.0552823		Pro-Ca+S100	7.2811	0.1884	119.894	0.034	1893
	27.1	28.2	11889.8	0.3671	0.0569934			7.6129	0.1892	122.52	0.038	1971
	26.7	27.1	11163	0.3795	0.0600206			8.1228	0.2021	139.486	0.038	2401
	26	25.7	10797.8	0.4344	0.0721305		S150	2.0228	0.1388	37.6205	0.007	692
	26	25.6	10764.4	0.4411	0.0754436			2.2162	0.1393	46.2072	0.009	820
	25.8	24.6	9271	0.453	0.0777109			2.6171	0.1875	49.436	0.01	827
	24.5	23.9	7959.6	0.4694	0.0798042		Pro-Ca+S150	4.31	0.2184	62.8194	0.024	1418
S100	16.8	22.5	5770.1	0.0987	0.0220262			5.6892	0.1888	95.9095	0.027	1650
	16.7	21.9	5186.5	0.1074	0.0230263			5.7736	0.1866	98.4669	0.027	1666
	16.5	20.7	4547.4	0.1104	0.0234958
	15.6	20.4	4149.4	0.1236	0.0240157
	15.5	19.3	4057.6	0.1406	0.0258391
	15.3	18.6	3845.1	0.1466	0.0273655
	14.8	18.5	3471.6	0.1676	0.0306705
	14.4	18.3	3404.7	0.1839	0.0343086
Pro-Ca+S100	19	27.7	5634.8	0.141	0.030818
	18.9	27.5	5450	0.1455	0.0314845
	18.5	27.5	5018.8	0.1814	0.0326402
	18.4	26.6	4718.63	0.196	0.0364408
	17.8	26.1	4565.2	0.1966	0.0366337
	17.6	25.4	4541.3	0.213	0.0372019
	17.3	25.3	4460.1	0.2348	0.0411142
	17	23.2	4279.4	0.2813	0.0453295
S150	13.6	18.6	2538.3	0.0693	0.0135641
	13	18.5	2424.5	0.0694	0.0166953
	12.5	17.8	2363.4	0.0695	0.0177873
	12.5	17	2334	0.0697	0.0179202
	12.2	16.7	2299.5	0.0699	0.018023
	11.3	16.2	2251.1	0.0704	0.0188554
	10.8	16	2234.6	0.0877	0.0225133
	10.6	15.6	2062.3	0.0922	0.0242475
Pro-Ca+S150	14.8	23.5	3651.1	0.0748	0.014374
	14.8	22.5	3309.5	0.0857	0.0206168
	14	21.7	3190.6	0.0902	0.0208594
	14	21.7	3100.4	0.0967	0.0213415
	13.5	21.2	3080.8	0.0981	0.0220088
	13.4	18.7	2721	0.1018	0.0225002
	13.2	18	2640.9	0.1081	0.0228126
	12.5	17.3	2474.8	0.1134	0.0234338
Huayouzha62							Huayouzha62
S0	26.2	27.6	14455.7	0.3368	0.0559544		S0	4.6548	0.1909	61.8725	0.024	621
	26.2	27.6	14231.1	0.3591	0.0560515			5.2988	0.2024	73.2135	0.026	706
	26.1	22.6	13616.2	0.3676	0.0563723			5.5197	0.2726	87.9319	0.036	924
	26	21.4	12583.3	0.3678	0.0605608		Pro-Ca+S0	18.1359	0.2088	147.057	0.096	1839
	24.9	21.2	12466.8	0.3697	0.0610864			16.7511	0.2194	150.746	0.086	2081
	24.7	20.9	11907.1	0.3922	0.0612169			19.7692	0.2692	161.436	0.103	2107
	24.5	19.7	11570.1	0.4076	0.0651909		S100	4.0672	0.2342	55.2785	0.023	818
	24.3	19.5	10345.7	0.4155	0.066711			4.199	0.2409	55.4836	0.024	819
Pro-Ca+S0	29.4	36.3	17582.3	0.411	0.0613685			4.7159	0.192	78.1802	0.025	1099
	29	36.3	16462.8	0.4144	0.0719685		Pro-Ca+S100	9.0472	0.2666	108.026	0.055	1943
	29	33.4	16163.9	0.4186	0.0759867			10.4819	0.2273	146.762	0.056	1729
	27.5	31.2	15497.5	0.4283	0.0763833			10.4638	0.2332	224.684	0.066	2424
	27.3	29.3	15348	0.4878	0.0779889		S150	2.0889	0.1995	30.2502	0.011	342
	27	29.1	14224.2	0.5178	0.0795352			2.3269	0.2017	30.662	0.014	365
	26.8	28.7	14151.8	0.5515	0.0839192			2.6046	0.2168	41.5531	0.013	497
	26.6	28.5	14059.3	0.5542	0.0869503		Pro-Ca+S150	6.5994	0.2461	94.7672	0.037	1207
S100	17.5	27.8	6159.3	0.1089	0.0219668			8.5703	0.247	109.543	0.053	1416
	16.9	27	6131	0.1154	0.0246618			8.4114	0.249	147.595	0.05	1692
	16.4	26.2	6120.3	0.128	0.0248166
	15	26	5457.2	0.1554	0.0324687
	14.9	25.6	4705.4	0.1785	0.0359207
	14.9	24.1	4521.3	0.1893	0.0388918
	14.6	22.9	3778.9	0.1933	0.0389922
	14.6	16.5	3459.7	0.2243	0.0396595
Pro-Ca+S100	18.7	33.2	7588.8	0.2192	0.0478475
	18.1	30	7143.2	0.2236	0.0490934
	17.6	28.4	7038	0.2259	0.0529981
	17.5	28.3	6800.3	0.2272	0.0540114
	17.3	28	6464.2	0.2366	0.0568467
	17.1	27.2	6331.3	0.2386	0.0580152
	17	26.9	6277.6	0.2505	0.0590171
	16.9	26.1	6200.3	0.2659	0.0608426
S150	14.2	24.2	4644.8	0.1237	0.0276518
	14	23.9	4502.8	0.1244	0.0301196
	13.2	22.1	4401.2	0.1394	0.0312266
	13.1	22	4167.3	0.1443	0.0318859
	13.1	21	4037.8	0.1525	0.0346739
	13.1	20.3	3722.9	0.1617	0.0390283
	13	19.5	3602.2	0.1648	0.0391245
	12.9	19.1	3429.7	0.165	0.0402302
Pro-Ca+S150	16.4	29.6	6103.3	0.1731	0.0406657
	16.2	28	6027.5	0.1786	0.0417049
	15.5	26	5569.8	0.186	0.0423227
	15.1	25.5	5561.4	0.2007	0.0434858
	14.7	25.4	5041.6	0.204	0.0440954
	14.5	25	4818.8	0.2099	0.0470121
	14.5	24.9	4734.6	0.2157	0.0522143
	14	22.4	4732.2	0.2354	0.0558826

## Sheet: Photosynthetic parameter
Huayouzha158R
	Net photosynthetic rate	Stomatal conductance	Intercellular CO2	Transpiration rate	Actual photochemical quantum efficiency
S0	22.2766	10.812	316.947	0.378285	0.859596
	23.2635	11.022	326.621	0.400089	0.885628
	24.7695	12.5231	329.205	0.415453	0.782336
	25.3632	13.2318	337.604	0.425971	0.780429
	26.9171	13.3033	338.582	0.439744
Pro-Ca+S0	23.9347	10.175	316.003	0.370502	0.915448
	25.7317	12.0828	326.668	0.393339	0.920815
	26.0132	12.1264	327.178	0.417827	0.941843
	26.0882	12.1268	328.76	0.424583	0.947258
	26.2507	12.4254	331.378	0.453529
S100	21.1308	9.3545	313.421	0.349151	0.694872
	22.075	10.0752	314.958	0.364057	0.698327
	22.7558	10.1506	316.075	0.371966	0.711497
	22.7748	10.1578	316.196	0.372202	0.7226
	23.7692	10.5404	318.522	0.380589
Pro-Ca+S100	23.7755	10.4369	328.059	0.349967	0.857147
	24.4946	10.8193	332.625	0.370193	0.871824
	24.8563	11.0572	333.832	0.385875	0.906325
	24.8846	11.5894	337.418	0.398731	0.931333
	25.1397	12.7798	337.714	0.400859
S150	19.3282	7.19536	308.309	0.336351	0.496195
	20.7588	8.13097	311.932	0.35117	0.561044
	21.1326	8.4748	325.011	0.354303	0.647739
	21.5851	8.72778	326.099	0.372223	0.656529
	22.2672	8.80408	330.427	0.391125
Pro-Ca+S150	21.0844	9.31545	325.053	0.356986	0.771875
	22.3799	10.0936	326.314	0.37036	0.776565
	23.3861	10.1396	328.69	0.372768	0.798393
	23.8951	10.2003	329.272	0.383714	0.865459
	24.4937	10.58	330.837	0.384554
Huayouzha62
S0	23.2976	10.3328	318.368	0.384796	1.09023
	24.2146	11.1621	320.555	0.407385	0.975298
	24.9948	12.995	331.231	0.415014	0.992619
	25.0896	13.1373	331.638	0.43477	1.01398
	25.3934	13.8819	333.802	0.434771
Pro-Ca+S0	25.3291	13.1341	333.15	0.412372	1.0894
	25.3673	13.2074	333.329	0.432081	1.07185
	25.4231	13.2959	333.705	0.436015	1.08282
	26.2271	13.5874	335.269	0.440202	1.02283
	26.4882	14.026	335.963	0.445365
S100	22.7833	11.4103	324.297	0.378558	0.797669
	22.9615	11.4327	324.505	0.403768	0.824265
	23.7526	12.1318	325.97	0.404793	0.864184
	23.7641	12.2573	331.391	0.441936	0.898525
	24.8527	12.3285	333.77	0.461949
Pro-Ca+S100	23.5319	10.058	312.809	0.426103	1.022
	25.8871	12.4404	321.464	0.430803	1.02026
	27.7217	12.4723	322.651	0.458308	0.926264
	28.0036	13.2415	328.033	0.46121	0.904181
	28.0902	13.3294	331.875	0.468662
S150	20.5929	8.89594	315.522	0.35126	0.554797
	20.7378	8.95448	318.345	0.380823	0.575199
	22.4241	10.6193	321.441	0.401536	0.685126
	22.5015	10.6335	322.447	0.40611	0.693862
	24.1319	13.2489	332.76	0.419369
Pro-Ca+S150	24.3067	10.3817	314.407	0.398313	0.666767
12	24.3559	10.3987	315.826	0.406906	0.679034
12	24.3776	12.3836	328.111	0.434025	0.878435
12	24.4318	12.4893	330.779	0.434873	0.914132
12	24.5819	12.7396	332.549	0.43848

## Sheet: Physiological
Huayouza158R
	ASA	POD	GSH	SOD	CAT	APX	Total soluble protein	PAL	Total soluble sugars	MDA
S0	39.4692	277	298.677	88.7243	283	245.4	36.0204	241.747	4.5872	1.25268
	39.5269	280.5	298.584	85.4815	324	314.8	36.2821	245.067	5.7686	1.30346
	40.5749	326	297.461	77.284	334.6	374.6	36.4349	270.493	5.82622	1.32582
	40.6344	344.5	297.443	75.4074	365.8	521.8	36.4895	271.6	5.88902	1.34818
	41.9793	345.5
Pro-Ca+S0	44.2916	401	296.348	128.428	395.8	408.6	37.4373	212.107	4.93841	1.06774
	44.3877	428.5	296.284	128.082	443	410.6	37.5956	212.88	5.40323	1.10222
	46.8084	441	295.82	127.868	449.8	434.2	37.6358	225.093	5.40701	1.26386
	46.8093	539	295.82	127.407	457.6	867.4	38.1375	225.307	6.07409	1.37054
	49.0846	585.5
S100	37.5225	464	297.438	169.646	376.4	134.2	37.0678	257.2	3.37232	1.25874
	37.5405	471.5	297.339	167.177	416.2	164.2	37.0994	266.773	3.49482	1.30346
	38.8313	473	296.645	148.947	420	168.2	37.1192	272.613	4.52476	1.30346
	38.8366	507	296.562	138.535	436.6	184.8	37.2051	275.733	4.97238	1.44368
	39.4264	526
Pro-Ca+S100	40.6537	555	298.234	208.049	494.6	424.2	37.9352	301.213	4.9561	1.33188
	41.0035	558.5	298.016	205.992	498.4	508.4	38.1337	314.16	5.22427	1.35424
	41.0238	568.5	298.002	185.761	499.4	563.4	38.2566	322.173	5.40713	1.36542
	41.6361	581.5	297.968	185.169	500.8	589.4	38.3691	325.013	5.98195	1.36542
	41.6775	593.5
S150	28.978	391.5	295.073	262.321	310.6	103.4	37.3185	250.267	3.26067	1.35424
	29.1943	445.5	294.888	260.872	315.8	125.8	37.5175	257.187	3.32079	1.47816
	30.0568	479	294.503	240.922	320.8	131.8	37.6585	257.76	3.3228	1.60114
	30.237	482	294.477	240.79	323.6	138	37.6733	264.56	3.34829	1.66822
	30.5454	494.5
Pro-Ca+S150	48.6286	503	297.557	256.066	409.2	404	38.1806	291.947	4.93561	1.31464
	50.1758	521	297.478	255.72	438	417	38.2705	296.12	5.00622	1.31464
	50.1802	532	296.874	247.498	470	426.4	38.2878	296.147	5.43543	1.33188
	50.241	550.5	296.798	216.971	472.4	438.4	38.3343	299.88	5.64067	1.36542
	50.2907	552
Huayouza62
S0	43.6692	323	297.699	175.029	404.8	365.4	36.5857	241.747	5.19445	1.53918
	43.7176	323	296.481	174.074	457.2	380.2	36.6044	245.067	6.19512	1.55036
	44.167	336	296.381	166.996	465.6	414.4	36.6552	270.493	5.30195	1.61232
	44.2357	347.5	296.358	166.173	493	441.2	36.8438	271.6	5.67134	1.63468
	44.4991	397
Pro-Ca+S0	51.3828	393.5	298.335	146.156	533	497.2	36.744	212.107	6.04787	1.25268
	51.5978	431	298.249	141.432	567	522.2	36.7604	212.88	6.82598	1.26386
	51.6181	442.5	297.943	129.646	618.4	681.6	36.8457	225.093	6.41378	1.29228
	53.4062	447	297.775	124.938	619.2	752.4	36.8535	225.307	6.66713	1.29228
	53.4282	467.5
S100	43.2308	534	293.358	175.144	744.8	564	37.6486	257.2	3.71866	1.56154
	43.3203	559	292.815	174.947	775.4	611.6	37.6756	266.773	3.7303	1.57878
	43.7493	570	291.982	170.189	788.2	618.6	37.6867	272.613	3.74945	1.61232
	43.8163	661	291.98	169.811	836.4	655.4	38.0299	275.733	3.76067	1.79726
	44.1551	674.5
Pro-Ca+S100	59.7026	698	296.645	246.37	906.2	960.2	38.5371	301.213	4.47329	1.3766
	59.7291	717	296.618	244.84	976.2	1197.2	38.5682	314.16	5.52884	1.47816
	60.7379	770.5	296.601	243.885	981	1216	38.7105	322.173	5.53049	1.4954
	60.7586	814	296.597	243.539	986.6	1256.2	38.7299	325.013	5.54817	1.64074
	60.8586	852
S150	36.926	190.5	296.069	214.782	571.2	604	37.3034	250.267	6.39165	1.7353
	36.9784	238.5	295.79	214.058	625	700	37.3592	257.187	6.45768	1.7982
	38.3075	244.5	293.039	211.457	629.8	825	37.4777	257.76	6.85756	1.8145
	38.3872	278.5	292.961	210.749	667.2	895.6	37.5842	264.56	6.88774	1.94354
	38.7978	312.5
Pro-Ca+S150	38.3229	257.5	297.197	222.173	853.8	989.4	37.6429	291.947	6.69384	1.41014
	38.3414	271.5	297.172	221.053	867.6	1174.2	37.6924	296.12	7.83067	1.41014
	38.3718	286.5	297.139	208.099	883.8	1339.6	37.7507	296.147	7.86524	1.41526
	38.4714	287	297.135	206.93	902.4	1765.4	37.7514	299.88	7.90079	1.42132
	38.5	295
